# Supplementary material
Source: Springer Nature journal article supplement (https://www.springermedizin.de/resource/supplementary/12879_2012_2011_MOESM2_ESM.pdf/9443524)
Supplement: MOESM2 [file 9443524]

**Table 3: Comparison of potential background risk factors for disease severity among individual diseases (n= 483)**

| <b>Risk factor for disease severity</b>                                                                    | <b>AOR (All cases)</b>                 | <b>AOR (Malaria cases)</b>              | <b>AOR (Pneumonia cases)</b>           | <b>AOR (Diarrhoea cases)</b>            |
|------------------------------------------------------------------------------------------------------------|----------------------------------------|-----------------------------------------|----------------------------------------|-----------------------------------------|
| <b>Caretaker's Education</b><br>No formal education<br>Primary education<br>Post-primary education         | 6.6 (2.7-15.8)<br>2.0 (1.0-4.0)<br>ref | §                                       | 1.8 (0.7-4.7)<br>1.7 (0.7-3.9)<br>ref  | 3.5 (0.6-21.4)<br>2.2 (0.4-10.6)<br>ref |
| <b>Caretaker's SES</b><br>Low<br>Middle<br>High                                                            | 1.5 (0.9-2.6)<br>1.9 (1.2-3.2)<br>ref  | 1.2 (0.4-3.7)<br>1.0 (0.4-2.8)<br>ref   | 1.8 (0.9-3.8)<br>2.2 (1.1-4.2)*<br>ref | 1.7 (0.6-4.8)<br>1.2 (0.4-3.5)<br>ref   |
| <b>No. of own alive children</b><br>1 child<br>2-3 children<br>4 or more children                          | ref<br>1.7 (1.1-2.7)<br>2.5 (1.4-4.5)  | ref<br>3.2 (1.0-10.4)<br>8.5 (2.3-30.6) | ref<br>0.7 (0.4-1.4)<br>1.5 (0.6-3.3)  | ref<br>2.0 (0.8-4.9)<br>1.1 (0.4-3.2)   |
| <b>Home-hospital travel time</b><br>0-59min<br>60-119min<br>120+ min                                       | ref<br>1.4 (0.9-2.3)<br>2.1 (1.3-3.4)  | ref<br>0.4 (0.1-1.5)<br>0.9 (0.3-2.9)   | ref<br>1.5 (0.8-2.7)<br>1.6 (0.9-3.1)  | ref<br>2.1 (0.7-6.2)<br>3.9 (1.4-10.9)  |
| <b>First Rx PCM alone for 24hrs or more</b><br>No<br>Yes                                                   | 1.8 (1.2-2.7)<br>ref                   | 0.9 (0.4-2.2)<br>ref                    | 1.8 (1.1-3.3)<br>ref                   | 1.7 (0.7-4.4)<br>ref                    |
| <b>Source of first Rx other than PCM</b><br>Home/local or drug shop<br>Private hospital<br>Public hospital | 3.2 (1.9-5.2)<br>1.9 (0.8-4.8)<br>ref  | §                                       | 2.4 (1.3-4.5)*<br>1.7 (0.5-5.5)<br>ref | 1.2 (0.5-2.8)<br>0.3 (0.1-1.5)<br>ref   |
| <b>Use of nearer PHC facility</b><br>No<br>Yes                                                             | ref<br>5.2 (3.0-9.1)                   | ref<br>4.2 (1.7-10.5)                   | ref<br>5.2 (2.3-11.9)                  | ref<br>4.4 (1.2-15.8)                   |

PCM = paracetamol. Rx = treatment. PHC = primary health care.

AOR\*\* Adjusted odds ratio; all other factors are adjusted, one at a time, for child's *Age* and *Sex*, and Caretakers *Education* and *socio-economic status (SES)*. The four factors used for adjustment were each adjusted for the other three.

§ - Numbers too small to enable any comparison across groups.
